# Supplementary material for: Risk of Kidney Injury among Construction Workers Exposed to Heat Stress: A Longitudinal Study from Saudi Arabia
Source: PubMed Central journal article supplement (PMC7312975; doi:10.3390/ijerph17113775), 2020-05-26
Supplement: ijerph-17-03775-s001.pdf [file ijerph-17-03775-s001.pdf]

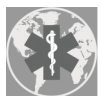

**Table S1.** Changes in body weight, blood pressure, fluid intake, hydration status, and urinary albumin-creatinine ratio (ACR) and reported heat related symptoms over four summer months (June–September, 2016) among 65 construction workers in Al-Ahsa, Saudi Arabia.

|                               | June       | September   | <i>p</i> -Value * |
|-------------------------------|------------|-------------|-------------------|
|                               | Mean ± SD  | Mean ± SD   |                   |
| Weight (kg)                   | 62.2 ± 8.4 | 64.0 ± 9.0  | 0.26              |
| SBP (mm Hg)                   | 126 ± 12   | 123 ± 14    | 0.26              |
| DBP (mm Hg)                   | 78 ± 7     | 77 ± 7      | 0.67              |
| ACR (mg/g)                    | 5.6 ± 13.0 | 20.1 ± 30.1 | <b>&lt;0.01</b>   |
| Daily fluid intake (L)        | 5.2 ± 2.8  | 5.0 ± 0.8   | 0.52              |
|                               | N (%)      | N (%)       |                   |
| Hydration status <sup>a</sup> |            |             |                   |
| Well hydrated                 | 32 (49%)   | 31 (48%)    | 0.86              |
| Minimal dehydration           | 26 (40%)   | 30 (46%)    | 0.48              |
| Significant dehydration       | 7 (11%)    | 4 (6%)      | 0.34              |
| Symptoms                      |            |             |                   |
| Dry Mouth                     | 25 (39%)   | 25 (39%)    | 0.57              |
| Muscle cramps                 | 18 (28%)   | 0           | <b>&lt;0.01</b>   |
| Headache                      | 15 (23%)   | 35 (54%)    | <b>&lt;0.01</b>   |
| Fever                         | 10 (15%)   | 24 (37%)    | <b>&lt;0.01</b>   |
| Nausea                        | 1 (2%)     | 0           | 0.50              |
| Vomiting                      | 2 (3%)     | 2 (3%)      | 0.69              |
| Tiredness                     | 3 (5%)     | 6 (9%)      | 0.26              |
| Dizziness                     | 1 (2%)     | 2 (3%)      | 0.50              |
| Clammy/moist skin             | 1 (2%)     | 0           | 0.50              |
| Swollen hands/feet            | 1 (2%)     | 0           | 0.50              |
| Hot and dry skin              | 0          | 2 (3%)      | 0.25              |

Note: systolic blood pressure (SBP); diastolic blood pressure (DBP). \* Paired t-test, chi-square or Fisher exact test; bold values denote statistical significance at  $p < 0.05$ . <sup>a</sup> Determined from self-reported rating of urine color: 1–2 well hydrated, 3–4 minimal dehydration, and 5–8 significant dehydration.

**Table S2.** Characteristics of 14 cases of albuminuria† among construction workers based on urinary albumin-creatinine ratio (ACR) measured in June and September, 2016.

| Case *   | Age (Years) | Job Title        | Total work Experience (Years) | Work Experience in SA (Years) | Shift Length (Hours) | Sleeping Time (Hours) | Smoking    | BMI (kg/m <sup>2</sup> ) | Hypertension | Diabetes   | ACR (mg/g) |            |
|----------|-------------|------------------|-------------------------------|-------------------------------|----------------------|-----------------------|------------|--------------------------|--------------|------------|------------|------------|
|          |             |                  |                               |                               |                      |                       |            |                          |              |            | June       | September  |
| <b>1</b> | <b>49</b>   | <b>Tiler</b>     | <b>28</b>                     | <b>26</b>                     | <b>10</b>            | <b>6</b>              | <b>Yes</b> | <b>28</b>                | <b>Yes</b>   | <b>No</b>  | <b>88</b>  | <b>132</b> |
| <b>2</b> | <b>45</b>   | <b>Tiler</b>     | <b>27</b>                     | <b>5</b>                      | <b>10</b>            | <b>6</b>              | <b>Yes</b> | <b>22</b>                | <b>No</b>    | <b>Yes</b> | <b>50</b>  | <b>47</b>  |
| <b>3</b> | <b>23</b>   | <b>Plasterer</b> | <b>5</b>                      | <b>0.4</b>                    | <b>10</b>            | <b>8</b>              | <b>No</b>  | <b>19</b>                | <b>No</b>    | <b>No</b>  | <b>40</b>  | <b>128</b> |
| 4        | 51          | Labrorer         | 25                            | 5                             | 10                   | 7                     | No         | 16                       | Yes          | No         | 11         | 34         |
| 5        | 36          | Tiler            | 8                             | 4                             | 10                   | 6                     | Yes        | 26                       | Yes          | No         | 9          | 81         |
| 6        | 36          | Block Layer      | 11                            | 0.7                           | 7                    | 8                     | Yes        | 22                       | No           | No         | 7          | 30         |
| 7        | 41          | Tiler            | 20                            | 2                             | 10                   | 6                     | Yes        | 26                       | No           | No         | 6          | 72         |
| 8        | 38          | Tiler            | 13                            | 3                             | 10                   | 6                     | No         | 20                       | No           | No         | 2          | 37         |
| 9        | 52          | Labrorer         | 26                            | 6                             | 10                   | 6                     | Yes        | 23                       | Yes          | No         | 2          | 82         |
| 10       | 36          | Labrorer         | 13                            | 3                             | 10                   | 6                     | Yes        | 29                       | No           | No         | 1          | 58         |
| 11       | 35          | Plasterer        | 15                            | 0.4                           | 10                   | 6                     | Yes        | 22                       | No           | No         | 1          | 72         |
| 12       | 43          | Tiler            | 25                            | 23                            | 10                   | 7                     | Yes        | 27                       | No           | No         | 1          | 86         |
| 13       | 24          | Carpenter        | 6                             | 1.6                           | 7                    | 8                     | Yes        | 19                       | No           | No         | 1          | 53         |
| 14       | 39          | Plasterer        | 21                            | 0.2                           | 10                   | 7                     | Yes        | 21                       | No           | No         | 1          | 51         |

Note: body mass index (BMI). † When urinary albumin-creatinine ratio (ACR)  $\geq 30$  mg/g, this is known as albuminuria. \* Bold text refers to the cases who were identified with persistent albuminuria over summer months.

**Table S3.** Distributions of sleeping hours by shift length among construction workers during the summer months (June–September, 2016) in Al-Ahsa, Saudi Arabia.

| Sleeping Hours | Shift length                    |                             |                              | <i>p</i> -Value* |
|----------------|---------------------------------|-----------------------------|------------------------------|------------------|
|                | All Workers<br>( <i>n</i> = 65) | 7 Hours<br>( <i>n</i> = 21) | 10 Hours<br>( <i>n</i> = 44) |                  |
| <8 h, N (%)    | 32 (49%)                        | 3 (14%)                     | 29 (66%)                     | <b>&lt;0.01</b>  |
| ≥8 h, N (%)    | 33 (51%)                        | 18 (86%)                    | 15 (34%)                     |                  |

\* Chi-square test; bold value denotes statistical significance at  $p < 0.05$ .

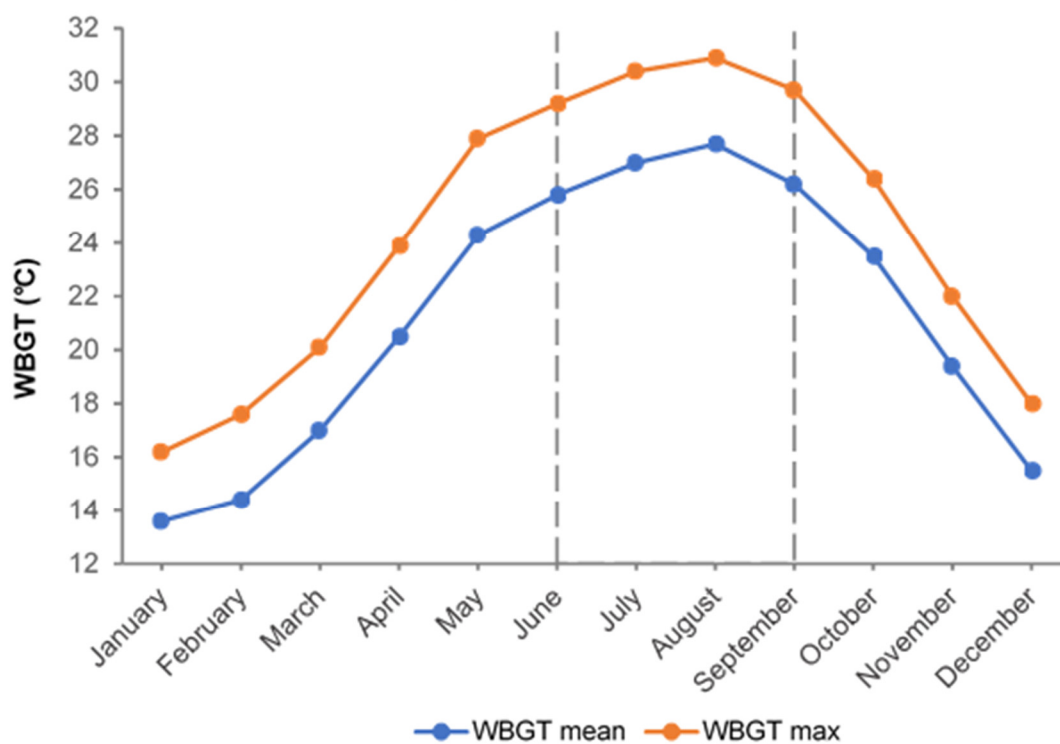**Figure S1.** Trends of the monthly averages of the mean and maximum wet bulb globe temperature (WBGT) in Al-Ahsa, Saudi Arabia (1981–2017). Source: ClimateCHIP database. (Vertical lines mark the months of the study period).
